# Supplementary material for: The Polygenic Map of Keloid Fibroblasts Reveals Fibrosis-Associated Gene Alterations in Inflammation and Immune Responses
Source: Front Immunol. 2022 Jan 10;12:810290. doi: 10.3389/fimmu.2021.810290 (PMC8785650; doi:10.3389/fimmu.2021.810290)
Supplement: Supplementary Table S3 — Detailed function of important genes. [file Table_3.xlsx]

## Sheet: Table S3
Table S3. Detailed function of important genes
Gene	Gene name	Entrez Gene Summary	GeneCards Summary	UniProtKB/Swiss-Prot Summary
NEO1	Neogenin 1	This gene encodes a cell surface protein that is a member of the immunoglobulin superfamily. The encoded protein consists of four N-terminal immunoglobulin-like domains, six fibronectin type III domains, a transmembrane domain and a C-terminal internal domain that shares homology with the tumor suppressor candidate gene DCC. This protein may be involved in cell growth and differentiation and in c…	NEO1 (Neogenin 1) is a Protein Coding gene. Diseases associated with NEO1 include Corneal Intraepithelial Neoplasm and Hemochromatosis Type 2. Among its related pathways are Neuroscience and Netrin-1 signaling. Gene Ontology (GO) annotations related to this gene include cadherin binding. An important paralog of this gene is DCC.	Multi-functional cell surface receptor regulating cell adhesion in many diverse developmental processes, including neural tube and mammary gland formation, myogenesis and angiogenesis. Receptor for members of the BMP, netrin, and repulsive guidance molecule (RGM) families. Netrin-Neogenin interactions result in a chemoattractive axon guidance response and cell-cell adhesion, the interaction betwe…
SKAP2	Src Kinase Associated Phosphoprotein 2	The protein encoded by this gene shares homology with Src kinase-associated phosphoprotein 1, and is a substrate of Src family kinases. It is an adaptor protein that is thought to play an essential role in the Src signaling pathway, and in regulating proper activation of the immune system. This protein contains an amino terminal coiled-coil domain for self-dimerization, a plecskstrin homology (PH…	SKAP2 (Src Kinase Associated Phosphoprotein 2) is a Protein Coding gene. Diseases associated with SKAP2 include Oral Candidiasis and Candidiasis. Among its related pathways are Cell junction organization and Yersinia infection. Gene Ontology (GO) annotations related to this gene include SH3/SH2 adaptor activity. An important paralog of this gene is SKAP1.	May be involved in B-cell and macrophage adhesion processes. In B-cells, may act by coupling the B-cell receptor (BCR) to integrin activation. May play a role in src signaling pathway.
BPGM	Bisphosphoglycerate Mutase	2,3-diphosphoglycerate (2,3-DPG) is a small molecule found at high concentrations in red blood cells where it binds to and decreases the oxygen affinity of hemoglobin. This gene encodes a multifunctional enzyme that catalyzes 2,3-DPG synthesis via its synthetase activity, and 2,3-DPG degradation via its phosphatase activity. The enzyme also has phosphoglycerate phosphomutase activity. Deficiency …	BPGM (Bisphosphoglycerate Mutase) is a Protein Coding gene. Diseases associated with BPGM include Erythrocytosis, Familial, 8 and Erythrocytosis, Familial, 4. Among its related pathways are Glucose metabolism and Metabolism. Gene Ontology (GO) annotations related to this gene include intramolecular transferase activity, phosphotransferases and bisphosphoglycerate 2-phosphatase activity. An import…	Plays a major role in regulating hemoglobin oxygen affinity by controlling the levels of its allosteric effector 2,3-bisphosphoglycerate (2,3-BPG). Also exhibits mutase (EC 5.4.2.11) activity.
QSOX1	Quiescin Sulfhydryl Oxidase 1	This gene encodes a protein that contains domains of thioredoxin and ERV1, members of two long-standing gene families. The gene expression is induced as fibroblasts begin to exit the proliferative cycle and enter quiescence, suggesting that this gene plays an important role in growth regulation. Two transcript variants encoding two different isoforms have been found for this gene.	QSOX1 (Quiescin Sulfhydryl Oxidase 1) is a Protein Coding gene. Diseases associated with QSOX1 include Breast Cancer. Among its related pathways are Response to elevated platelet cytosolic Ca2+ and Innate Immune System. Gene Ontology (GO) annotations related to this gene include protein disulfide isomerase activity and flavin-linked sulfhydryl oxidase activity. An important paralog of this gene i…	Catalyzes the oxidation of sulfhydryl groups in peptide and protein thiols to disulfides with the reduction of oxygen to hydrogen peroxide (PubMed:17331072, PubMed:18393449, PubMed:23704371, PubMed:30367560, PubMed:23867277). Plays a role in disulfide bond formation in a variety of extracellular proteins (PubMed:17331072, PubMed:30367560, PubMed:22801504, PubMed:23867277). In fibroblasts, require…
FAF2	Fas Associated Factor Family Member 2	The protein encoded by this gene is highly expressed in peripheral blood of patients with atopic dermatitis (AD), compared to normal individuals. It may play a role in regulating the resistance to apoptosis that is observed in T cells and eosinophils of AD patients.	FAF2 (Fas Associated Factor Family Member 2) is a Protein Coding gene. Diseases associated with FAF2 include Dermatitis and Neuronopathy, Distal Hereditary Motor, Type Viii. Among its related pathways are Innate Immune System and Glucose / Energy Metabolism. Gene Ontology (GO) annotations related to this gene include ubiquitin protein ligase binding and lipase inhibitor activity. An important par…	Plays an important role in endoplasmic reticulum-associated degradation (ERAD) that mediates ubiquitin-dependent degradation of misfolded endoplasmic reticulum proteins (PubMed:18711132, PubMed:24215460). By controlling the steady-state expression of the IGF1R receptor, indirectly regulates the insulin-like growth factor receptor signaling pathway (PubMed:26692333). Involved in inhibition of lipi…
GRN	Granulin Precursor	Granulins are a family of secreted, glycosylated peptides that are cleaved from a single precursor protein with 7.5 repeats of a highly conserved 12-cysteine granulin/epithelin motif. The 88 kDa precursor protein, progranulin, is also called proepithelin and PC cell-derived growth factor. Cleavage of the signal peptide produces mature granulin which can be further cleaved into a variety of active…	GRN (Granulin Precursor) is a Protein Coding gene. Diseases associated with GRN include Ceroid Lipofuscinosis, Neuronal, 11 and Frontotemporal Lobar Degeneration With Tdp43 Inclusions, Grn-Related. Among its related pathways are Innate Immune System and Integrated Breast Cancer Pathway. Gene Ontology (GO) annotations related to this gene include growth factor activity.	Secreted protein that acts as a key regulator of lysosomal function and as a growth factor involved in inflammation, wound healing and cell proliferation (PubMed:28541286, PubMed:28073925, PubMed:18378771, PubMed:28453791, PubMed:12526812). Regulates protein trafficking to lysosomes and, also the activity of lysosomal enzymes (PubMed:28453791, PubMed:28541286). Facilitates also the acidification …
ITGB2	Integrin Subunit Beta 2	This gene encodes an integrin beta chain, which combines with multiple different alpha chains to form different integrin heterodimers. Integrins are integral cell-surface proteins that participate in cell adhesion as well as cell-surface mediated signalling. The encoded protein plays an important role in immune response and defects in this gene cause leukocyte adhesion deficiency. Alternative spl…	ITGB2 (Integrin Subunit Beta 2) is a Protein Coding gene. Diseases associated with ITGB2 include Leukocyte Adhesion Deficiency, Type I and Pertussis. Among its related pathways are Integrin Pathway and Degradation of the extracellular matrix. Gene Ontology (GO) annotations related to this gene include protein heterodimerization activity. An important paralog of this gene is ITGB7.	Integrin ITGAL/ITGB2 is a receptor for ICAM1, ICAM2, ICAM3 and ICAM4. Integrin ITGAL/ITGB2 is also a receptor for the secreted form of ubiquitin-like protein ISG15; the interaction is mediated by ITGAL (PubMed:29100055). Integrins ITGAM/ITGB2 and ITGAX/ITGB2 are receptors for the iC3b fragment of the third complement component and for fibrinogen. Integrin ITGAX/ITGB2 recognizes the sequence G-P-R…
IL17A	Interleukin 17A	The protein encoded by this gene is a proinflammatory cytokine produced by activated T cells. This cytokine regulates the activities of NF-kappaB and mitogen-activated protein kinases. This cytokine can stimulate the expression of IL6 and cyclooxygenase-2 (PTGS2/COX-2), as well as enhance the production of nitric oxide (NO). High levels of this cytokine are associated with several chronic inflamm…	IL17A (Interleukin 17A) is a Protein Coding gene. Diseases associated with IL17A include Arthritis and Bronchiolitis Obliterans. Among its related pathways are PEDF Induced Signaling and Immune response IL-23 signaling pathway. Gene Ontology (GO) annotations related to this gene include cytokine activity. An important paralog of this gene is IL17F.	Ligand for IL17RA and IL17RC (PubMed:17911633). The heterodimer formed by IL17A and IL17F is a ligand for the heterodimeric complex formed by IL17RA and IL17RC (PubMed:18684971). Involved in inducing stromal cells to produce proinflammatory and hematopoietic cytokines (PubMed:8676080).
IL17RA	Interleukin 17 Receptor A	Interleukin 17A (IL17A) is a proinflammatory cytokine secreted by activated T-lymphocytes. It is a potent inducer of the maturation of CD34-positive hematopoietic precursors into neutrophils. The transmembrane protein encoded by this gene (interleukin 17A receptor; IL17RA) is a ubiquitous type I membrane glycoprotein that binds with low affinity to interleukin 17A. Interleukin 17A and its recepto…	IL17RA (Interleukin 17 Receptor A) is a Protein Coding gene. Diseases associated with IL17RA include Immunodeficiency 51 and Chronic Mucocutaneous Candidiasis. Among its related pathways are IL-17 Family Signaling Pathways and Akt Signaling. Gene Ontology (GO) annotations related to this gene include interleukin-17 receptor activity. An important paralog of this gene is IL17RD.	Receptor for IL17A (PubMed:17911633, PubMed:9367539). Receptor for IL17F (PubMed:19838198, PubMed:17911633). Binds to IL17A with higher affinity than to IL17F (PubMed:17911633). Binds IL17A and IL17F homodimers as part of a heterodimeric complex with IL17RC (PubMed:16785495). Also binds heterodimers formed by IL17A and IL17F as part of a heterodimeric complex with IL17RC (PubMed:18684971). Recept…
CXCL3	C-X-C Motif Chemokine Ligand 3	This antimicrobial gene encodes a member of the CXC subfamily of chemokines. The encoded protein is a secreted growth factor that signals through the G-protein coupled receptor, CXC receptor 2. This protein plays a role in inflammation and as a chemoattractant for neutrophils.	CXCL3 (C-X-C Motif Chemokine Ligand 3) is a Protein Coding gene. Diseases associated with CXCL3 include Melanoma. Among its related pathways are Signaling by GPCR and PEDF Induced Signaling. Gene Ontology (GO) annotations related to this gene include chemokine activity and CXCR chemokine receptor binding. An important paralog of this gene is CXCL2.	Ligand for CXCR2 (By similarity). Has chemotactic activity for neutrophils. May play a role in inflammation and exert its effects on endothelial cells in an autocrine fashion. In vitro, the processed form GRO-gamma(5-73) shows a fivefold higher chemotactic activity for neutrophilic granulocytes.
CXCL8	C-X-C Motif Chemokine Ligand 8	The protein encoded by this gene is a member of the CXC chemokine family and is a major mediator of the inflammatory response. The encoded protein is commonly referred to as interleukin-8 (IL-8). IL-8 is secreted by mononuclear macrophages, neutrophils, eosinophils, T lymphocytes, epithelial cells, and fibroblasts. It functions as a chemotactic factor by guiding the neutrophils to the site of inf…	CXCL8 (C-X-C Motif Chemokine Ligand 8) is a Protein Coding gene. Diseases associated with CXCL8 include Melanoma and Adult Respiratory Distress Syndrome. Among its related pathways are Regulation of Wnt-mediated beta catenin signaling and target gene transcription and Transcriptional misregulation in cancer. Gene Ontology (GO) annotations related to this gene include chemokine activity and interl…	IL-8 is a chemotactic factor that attracts neutrophils, basophils, and T-cells, but not monocytes. It is also involved in neutrophil activation. It is released from several cell types in response to an inflammatory stimulus. IL-8(6-77) has a 5-10-fold higher activity on neutrophil activation, IL-8(5-77) has increased activity on neutrophil activation and IL-8(7-77) has a higher affinity to recept…
HSP90B1	Heat Shock Protein 90 Beta Family Member 1	This gene encodes a member of a family of adenosine triphosphate(ATP)-metabolizing molecular chaperones with roles in stabilizing and folding other proteins. The encoded protein is localized to melanosomes and the endoplasmic reticulum. Expression of this protein is associated with a variety of pathogenic states, including tumor formation. There is a microRNA gene located within the 5' exon of th…	HSP90B1 (Heat Shock Protein 90 Beta Family Member 1) is a Protein Coding gene. Diseases associated with HSP90B1 include Bipolar Disorder and Platyspondylic Lethal Skeletal Dysplasia, Torrance Type. Among its related pathways are AKT Siganaling Pathway and Photodynamic therapy-induced unfolded protein response. Gene Ontology (GO) annotations related to this gene include calcium ion binding and unf…	Molecular chaperone that functions in the processing and transport of secreted proteins (By similarity). When associated with CNPY3, required for proper folding of Toll-like receptors (By similarity). Functions in endoplasmic reticulum associated degradation (ERAD) (PubMed:18264092). Has ATPase activity (By similarity).
