# Supplementary material for: The Polygenic Map of Keloid Fibroblasts Reveals Fibrosis-Associated Gene Alterations in Inflammation and Immune Responses
Source: Front Immunol. 2022 Jan 10;12:810290. doi: 10.3389/fimmu.2021.810290 (PMC8785650; doi:10.3389/fimmu.2021.810290)
Supplement: Supplementary Table S4 — Fibroblast growth factor receptor associated publications. [file Table_4.xlsx]

## Sheet: Table S4
Table S4. Fibroblast growth factor receptor associated publications
PMID	Title	Authors	Abstrct	Disease
26438159	ERK Signal Suppression and Sensitivity to CH5183284/Debio 1347, a Selective FGFR Inhibitor	Yoshito Nakanishi 1, Hideaki Mizuno 2, Hitoshi Sase 2, Toshihiko Fujii 2, Kiyoaki Sakata 2, Nukinori Akiyama 2, Yuko Aoki 2, Masahiro Aoki 2, Nobuya Ishii 2	Drugs that target specific gene alterations have proven beneficial in the treatment of cancer. Because cancer cells have multiple resistance mechanisms, it is important to understand the downstream pathways of the target genes and monitor the pharmacodynamic markers associated with therapeutic efficacy. We performed a transcriptome analysis to characterize the response of various cancer cell line…	TUMOR
22238366	Ponatinib (AP24534), a multitargeted pan-FGFR inhibitor with activity in multiple FGFR-amplified or mutated cancer models	Joseph M Gozgit 1, Matthew J Wong, Lauren Moran, Scott Wardwell, Qurish K Mohemmad, Narayana I Narasimhan, William C Shakespeare, Frank Wang, Tim Clackson, Victor M Rivera	Members of the fibroblast growth factor receptor family of kinases (FGFR1-4) are dysregulated in multiple cancers. Ponatinib (AP24534) is an oral multitargeted tyrosine kinase inhibitor being explored in a pivotal phase II trial in patients with chronic myelogenous leukemia due to its potent activity against BCR-ABL. Ponatinib has also been shown to inhibit the in vitro kinase activity of all fou…	TUMOR
28108151	A Functional Genetic Screen Identifies the Phosphoinositide 3-kinase Pathway as a Determinant of Resistance to Fibroblast Growth Factor Receptor Inhibitors in FGFR Mutant Urothelial Cell Carcinoma	Liqin Wang 1, Ton 1, Rodrigo Leite de Oliveira 1, Cor Lieftink 1, Pasi Halonen 1, Marieke van de Ven 2, Roderick L Beijersbergen 1, Michel M van den Heuvel 3, René Bernards 4, Michiel S van der Heijden 5	Activating mutations and translocations of the FGFR3 gene are commonly seen in urothelial cell carcinoma (UCC) of the bladder and urinary tract. Several fibroblast growth factor receptor (FGFR) inhibitors are currently in clinical development and response rates appear promising for advanced UCC. A common problem with targeted therapeutics is intrinsic or acquired resistance of the cancer cells. T…	Urothelial Cell Carcinoma
26324363	Phase I Dose-Escalation Study of JNJ-42756493, an Oral Pan-Fibroblast Growth Factor Receptor Inhibitor, in Patients With Advanced Solid Tumors	Josep Tabernero 1, Rastislav Bahleda 2, Rodrigo Dienstmann 2, Jeffrey R Infante 2, Alain Mita 2, Antoine Italiano 2, Emiliano Calvo 2, Victor Moreno 2, Barbara Adamo 2, Anas Gazzah 2, Bob Zhong 2, Suso J Platero 2, Johan W Smit 2, Kim Stuyckens 2, Moitreyee Chatterjee-Kishore 2, Jordi Rodon 2, Vijay Peddareddigari 2, Feng R Luo 2, Jean-Charles Soria 2	Purpose:JNJ-42756493 is an orally administered pan-fibroblast growth factor receptor (FGFR) tyrosine kinase inhibitor. This first-in-human study evaluates the safety, pharmacokinetics, and pharmacodynamics and defines the recommended phase II dose (RP2D) of JNJ-42756493.Patients and methods:Eligible patients with advanced solid tumors received escalating doses of JNJ-42756493 from 0.5 to 12 mg ad…	advanced solid tumors
14534538	The phosphotyrosine phosphatase SHP2 is a critical mediator of transformation induced by the oncogenic fibroblast growth factor receptor 3	Yehenew M Agazie 1, Nieves Movilla, Irene Ischenko, Michael J Hayman	Receptor tyrosine kinases (RTKs) such as the fibroblast growth factor receptor (FGFR) and the epidermal growth factor receptor are overexpressed in a variety of cancers. In addition to overexpression, the FGFRs are found mutated in some cancers. The Src homology 2 domain-containing phosphotyrosine phosphatase (SHP2) is a critical mediator of RTK signaling, but its role in oncogenic RTK-induced ce…	TUMOR
28034880	Polyclonal Secondary FGFR2 Mutations Drive Acquired Resistance to FGFR Inhibition in Patients with FGFR2 Fusion-Positive Cholangiocarcinoma	Lipika Goyal 1, Supriya K Saha 1, Leah Y Liu 1, Giulia Siravegna 2 3 4, Ignaty Leshchiner 5, Leanne G Ahronian 1, Jochen K Lennerz 6, Phuong Vu 1, Vikram Deshpande 6, Avinash Kambadakone 7, Benedetta Mussolin 2, Stephanie Reyes 1, Laura Henderson 1, Jiaoyuan Elisabeth Sun 1, Emily E Van Seventer 1, Joseph M Gurski Jr 1, Sabrina Baltschukat 8, Barbara Schacher-Engstler 8, Louise Barys 8, Christell…	Genetic alterations in the fibroblast growth factor receptor (FGFR) pathway are promising therapeutic targets in many cancers, including intrahepatic cholangiocarcinoma (ICC). The FGFR inhibitor BGJ398 displayed encouraging efficacy in patients with FGFR2 fusion-positive ICC in a phase II trial, but the durability of response was limited in some patients. Here, we report the molecular basis for a…	intrahepatic cholangiocarcinoma
10630964	The antisense oligonucleotide ISIS 2922 prevents cytomegalovirus-induced upregulation of IL-8 and ICAM-1 in cultured human fibroblasts	J Cinatl Jr 1, R Kotchetkov, E Weimer, R A Blaheta, M Scholz, J U Vogel, H O Gümbel, H W Doerr	Human cytomegalovirus (HCMV) infection is associated with excessive proinflammatory immune responses such as cytokine/chemokine production or upregulation of adhesion molecules on the host cells. It is assumed that these features of HCMV-related immunopathology can not be treated effectively with currently available anti HCMV drugs. In the present study the efficacy of ganciclovir (GCV), foscarne…	HCMV-related immunopathogenesis
22837387	Transforming fusions of FGFR and TACC genes in human glioblastoma	Devendra Singh 1, Joseph Minhow Chan, Pietro Zoppoli, Francesco Niola, Ryan Sullivan, Angelica Castano, Eric Minwei Liu, Jonathan Reichel, Paola Porrati, Serena Pellegatta, Kunlong Qiu, Zhibo Gao, Michele Ceccarelli, Riccardo Riccardi, Daniel J Brat, Abhijit Guha, Ken Aldape, John G Golfinos, David Zagzag, Tom Mikkelsen, Gaetano Finocchiaro, Anna Lasorella, Raul Rabadan, Antonio Iavarone	The brain tumor glioblastoma multiforme (GBM) is among the most lethal forms of human cancer. Here, we report that a small subset of GBMs (3.1%; 3 of 97 tumors examined) harbors oncogenic chromosomal translocations that fuse in-frame the tyrosine kinase coding domains of fibroblast growth factor receptor (FGFR) genes (FGFR1 or FGFR3) to the transforming acidic coiled-coil (TACC) coding domains of…	glioblastoma multiforme
11149756	Isolation and serum-free culture of epithelial cells derived from epithelial rests of Malassez in human periodontal ligament	T Yamanaka 1, A Sakamoto, Y Tanaka, Y Zhang, Y Hayashido, S Toratani, Y Akagawa, T Okamoto	To study biological character and function of epithelial rests of Malassez (ERM) in human periodontal ligament, we have developed a serum-free culture system of epithelial cells (ME) derived from ERM. The mitogenic effects of fibroblast growth factor (FGF)-1, FGF-2, and FGF-7/keratinocyte growth factor (KGF) on ME, human periodontal ligament-derived fibroblasts (PLF), human oral epithelial cells …	inflammated disease
9013707	The p53-regulated cyclin G gene promotes cell growth: p53 downstream effectors cyclin G and Gadd45 exert different effects on cisplatin chemosensitivity	M L Smith 1, H U Kontny, R Bortnick, A J Fornace Jr	Among the p53-regulated genes that have been identified thus far, cyclin G is a relatively recent one. We conducted a series of experiments aimed at elucidating cyclin G function. Ectopic overexpression of cyclin G in human RKO colon carcinoma cells accelerated cell growth. Transfection of normal human fibroblasts with the cyclin G expression vector promoted clonal expansion. Cyclin G immune comp…	colon carcinoma
18559524	BIBF 1120: triple angiokinase inhibitor with sustained receptor blockade and good antitumor efficacy	Frank Hilberg 1, Gerald J Roth, Martin Krssak, Susanna Kautschitsch, Wolfgang Sommergruber, Ulrike Tontsch-Grunt, Pilar Garin-Chesa, Gerd Bader, Andreas Zoephel, Jens Quant, Armin Heckel, Wolfgang J Rettig	Inhibition of tumor angiogenesis through blockade of the vascular endothelial growth factor (VEGF) signaling pathway is a novel treatment modality in oncology. Preclinical findings suggest that long-term clinical outcomes may improve with blockade of additional proangiogenic receptor tyrosine kinases: platelet-derived growth factor receptors (PDGFR) and fibroblast growth factor receptors (FGFR). …	TUMOR
32315352	INCB054828 (pemigatinib), a potent and selective inhibitor of fibroblast growth factor receptors 1, 2, and 3, displays activity against genetically defined tumor models	Phillip C C Liu 1, Holly Koblish 1, Liangxing Wu 2, Kevin Bowman 1, Sharon Diamond 1, Darlise DiMatteo 1, Yue Zhang 1, Michael Hansbury 1, Mark Rupar 1, Xiaoming Wen 1, Paul Collier 1, Patricia Feldman 1, Ronald Klabe 1, Krista A Burke 1, Maxim Soloviev 1, Christine Gardiner 1, Xin He 1, Alla Volgina 1, Maryanne Covington 1, Bruce Ruggeri 1, Richard Wynn 1, Timothy C Burn 1, Peggy Scherle 1, Swam…	Alterations in fibroblast growth factor receptor (FGFR) genes have been identified as potential driver oncogenes. Pharmacological targeting of FGFRs may therefore provide therapeutic benefit to selected cancer patients, and proof-of-concept has been established in early clinical trials of FGFR inhibitors. Here, we present the molecular structure and preclinical characterization of INCB054828 (pem…	TUMOR
26270481	Development and Characterization of Bladder Cancer Patient-Derived Xenografts for Molecularly Guided Targeted Therapy	Chong-Xian Pan 1, Hongyong Zhang 2, Clifford G Tepper 3, Tzu-yin Lin 2, Ryan R Davis 4, James Keck 5, Paramita M Ghosh 6, Parkash Gill 7, Susan Airhart 5, Carol Bult 5, David R Gandara 2, Edison Liu 5, Ralph W de Vere White 8	Background:The overarching goal of this project is to establish a patient-derived bladder cancer xenograft (PDX) platform, annotated with deep sequencing and patient clinical information, to accelerate the development of new treatment options for bladder cancer patients. Herein, we describe the creation, initial characterization and use of the platform for this purpose.Methods and findings:Twenty…	bladder cancer
17332304	Biological characterization of ARRY-142886 (AZD6244), a potent, highly selective mitogen-activated protein kinase kinase 1/2 inhibitor	Tammie C Yeh 1, Vivienne Marsh, Bryan A Bernat, Josh Ballard, Heidi Colwell, Ron J Evans, Janet Parry, Darin Smith, Barbara J Brandhuber, Stefan Gross, Allison Marlow, Brian Hurley, Joe Lyssikatos, Patrice A Lee, James D Winkler, Kevin Koch, Eli Wallace	Purpose:The Ras-Raf-mitogen-activated protein kinase kinase (MEK) pathway is overactive in many human cancers and is thus a target for novel therapeutics. We have developed a highly potent and selective inhibitor of MEK1/2. The purpose of these studies has been to show the biological efficacy of ARRY-142886 (AZD6244) in enzymatic, cellular, and animal models.Experimental design:The ability of ARR…	colorectal and BxPC3 pancreatic xenograft tumor models
27338794	A combinatorial strategy for treating KRAS-mutant lung cancer	Eusebio Manchado, Susann Weissmueller, John P Morris 4th, Chi-Chao Chen, Ramona Wullenkord, Amaia Lujambio, Elisa de Stanchina, John T Poirier, Justin F Gainor, Ryan B Corcoran, Jeffrey A Engelman, Charles M Rudin, Neal Rosen, Scott W Lowe	Therapeutic targeting of KRAS-mutant lung adenocarcinoma represents a major goal of clinical oncology. KRAS itself has proved difficult to inhibit, and the effectiveness of agents that target key KRAS effectors has been thwarted by activation of compensatory or parallel pathways that limit their efficacy as single agents. Here we take a systematic approach towards identifying combination targets …	lung adenocarcinoma
10037173	Anti-epidermal growth factor receptor antibody C225 inhibits angiogenesis in human transitional cell carcinoma growing orthotopically in nude mice	P Perrotte 1, T Matsumoto, K Inoue, H Kuniyasu, B Y Eve, D J Hicklin, R Radinsky, C P Dinney	Epidermal growth factor receptor (EGFR) regulates the growth and progression of human transitional cell carcinoma (TCC) of the bladder. We have shown that therapy targeting EGFR inhibited the growth of human TCC established orthotopically in nude mice. The purpose of this study was to evaluate whether EGFR-directed therapy affects angiogenesis associated with the growth and metastasis of human TC…	transitional cell carcinoma (TCC) of the bladder
27271022	Spectrum of genomic alterations in FGFR3: current appraisal of the potential role of FGFR3 in advanced urothelial carcinoma	Nan Sethakorn 1, Peter H O'Donnell 2 3	Molecular analysis has identified subsets of urothelial carcinoma (UC) expressing distinct genetic signatures. Genomic alterations in the oncogenic fibroblast growth factor receptor 3 (FGFR3) pathway are among the most well described in UC and have led to extensive and ongoing investigation of FGFR3-targeted therapies in this disease, although no new drugs have yet been approved. Given the unmet …	urothelial carcinoma
9029113	Activation of the lymphotoxin beta receptor by cross-linking induces chemokine production and growth arrest in A375 melanoma cells	M A Degli-Esposti 1, T Davis-Smith, W S Din, P J Smolak, R G Goodwin, C A Smith	The lymphotoxin beta receptor (LT beta R) was originally described as a transcribed sequence encoded on human chromosome 12p, with homology to the TNF receptor family. Subsequently, a recombinant LT beta R was shown to bind LT alpha LT beta heteromeric complexes. In this study, we have shown that LT beta R is expressed in a variety of tissues and cell lines of monocytic lineage, as well as in fib…	melanoma
27053219	Evaluation of FGFR3 as a Therapeutic Target in Head and Neck Squamous Cell Carcinoma	Anne von M<U+00E4>ssenhausen 1 2 3, Mario Deng 4 5, Hannah Billig 1 2 3, Angela Queisser 1 2 3, Wenzel Vogel 4 5, Glen Kristiansen 2 3, Andreas Schr<U+00F6>ck 3 6, Friedrich Bootz 3 6, Friederike G<U+00F6>ke 1 2 3, Alina Franzen 1 2 3, Lynn Heasley 7, Jutta Kirfel 2 3, Johannes Br<U+00E4>gelmann 1 3 8, Sven Perner 9 10	Background:Although head and neck squamous cell carcinoma (HNSCC) is the sixth most common tumour entity worldwide, it remains a clinical challenge. Large-scale explorative genomic projects have identified several genes as potential targets for therapy, including fibroblast growth factor receptor 3 (FGFR3).Aims:The aim of this study was to investigate the biological significance of wild-type and …	head and neck squamous cell carcinoma
25394791	Patient-derived models of acquired resistance can identify effective drug combinations for cancer	Adam S Crystal 1, Alice T Shaw 1, Lecia V Sequist 1, Luc Friboulet 1, Matthew J Niederst 1, Elizabeth L Lockerman 1, Rosa L Frias 1, Justin F Gainor 1, Arnaud Amzallag 1, Patricia Greninger 1, Dana Lee 1, Anuj Kalsy 1, Maria Gomez-Caraballo 1, Leila Elamine 1, Emily Howe 1, Wooyoung Hur 2, Eugene Lifshits 1, Hayley E Robinson 3, Ryohei Katayama 1, Anthony C Faber 1, Mark M Awad 1, Sridhar Ramaswa…	Targeted cancer therapies have produced substantial clinical responses, but most tumors develop resistance to these drugs. Here, we describe a pharmacogenomic platform that facilitates rapid discovery of drug combinations that can overcome resistance. We established cell culture models derived from biopsy samples of lung cancer patients whose disease had progressed while on treatment with epiderm…	lung cancer
19331127	Bortezomib therapeutic effect is associated with expression of FGFR3 in multiple myeloma cells	Min Guan 1, Lijun Zhu, George Somlo, Alison Hughes, Bingsen Zhou, Yun Yen	The ectopically expressed and deregulated fibroblast growth factor receptor 3 (FGFR3) has been observed in approximately 20% of multiple myeloma (MM) patients. In this study, we investigated whether the therapeutic effect of bortezomib is associated with FGFR3 expression.Materials and methods:Cell proliferation and apoptosis assays were performed in minimal FGFR3 expressing U266 cells and compare…	multiple myeloma
23597562	Inhibition of tumor angiogenesis and growth by a small-molecule multi-FGF receptor blocker with allosteric properties	Fran<U+00E7>oise Bono 1, Frederik De Smet, Corentin Herbert, Katrien De Bock, Maria Georgiadou, Pierre Fons, Marc Tjwa, Chantal Alcouffe, Annelii Ny, Marc Bianciotto, Bart Jonckx, Masahiro Murakami, Anthony A Lanahan, Christof Michielsen, David Sibrac, Frédérique Dol-Gleizes, Massimiliano Mazzone, Serena Zacchigna, Jean-Pascal Herault, Christian Fischer, Patrice Rigon, Carmen Ruiz de Almodovar, F…	Receptor tyrosine kinases (RTK) are targets for anticancer drug development. To date, only RTK inhibitors that block orthosteric binding of ligands and substrates have been developed. Here, we report the pharmacologic characterization of the chemical SSR128129E (SSR), which inhibits fibroblast growth factor receptor (FGFR) signaling by binding to the extracellular FGFR domain without affecting or…	arthritis and tumors
